# Supplementary material
Source: Springer Nature journal article supplement (https://www.springermedizin.de/resource/supplementary/10194_2013_1040_MOESM1_ESM.pdf/9423246)

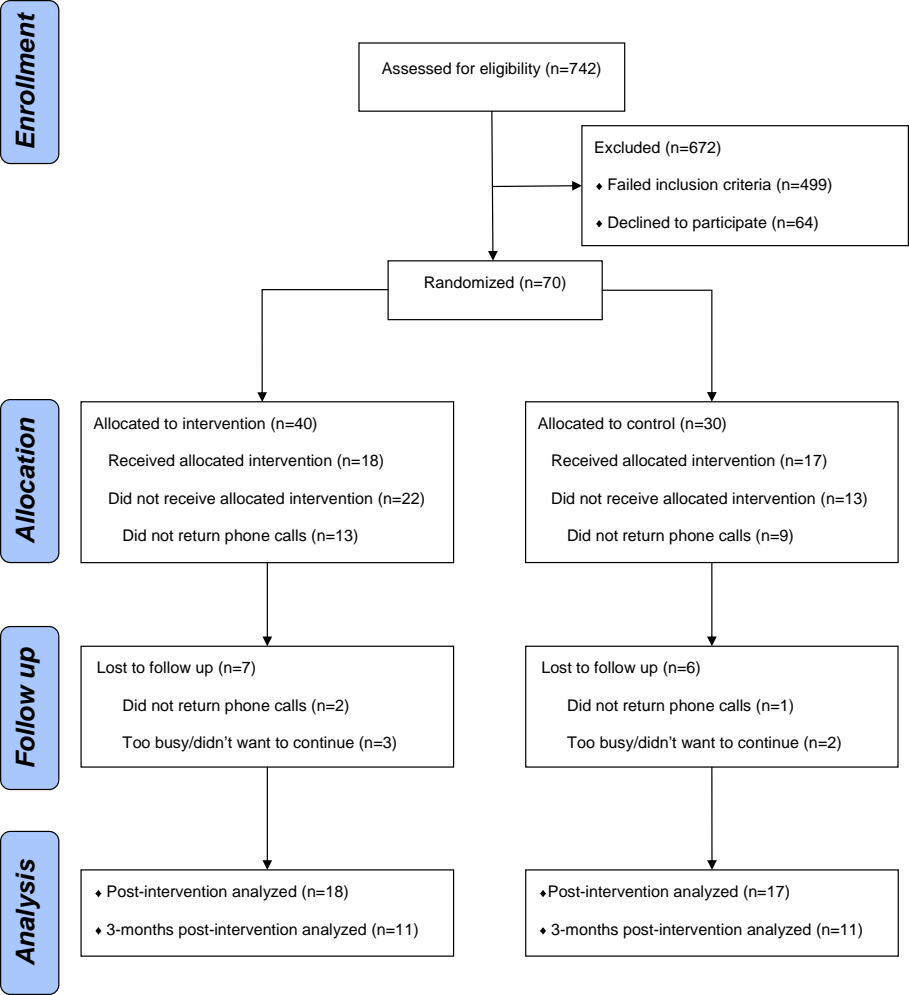

Supplement: MOESM1 [file 9423246]
